# Supplementary material for: Use of novel lab assays to examine the effect of pyrethroid-treated bed nets on blood-feeding success and longevity of highly insecticide-resistant Anopheles gambiae s.l. mosquitoes
Source: Parasit Vectors. 2022 Mar 28;15:111. doi: 10.1186/s13071-022-05220-y (PMC8962112; doi:10.1186/s13071-022-05220-y)
Supplement: Supplementary file 5 — Additional file 5: Table B. Statistical analysis summaries. [file 13071_2022_5220_MOESM5_ESM.csv]

experimental.blocks	age.at.first.exposure	age.at.death	days.post.exposure	strain	net.types	ttt.fed	kd.5min	kd.1h	time.spent.on.the.net	feeding.duration	feeding.status	censor	subset.1	subset.2
1	4	17	13	Yao Koffikro	UTN	control.0	0	0	300	0	0	1	1	1
1	4	11	7	Yao Koffikro	UTN	control.0	0	0	0	0	0	1	1	1
1	4	20	16	Yao Koffikro	UTN	control.0	0	0	0	0	0	1	1	1
1	4	18	14	Yao Koffikro	UTN	control.0	0	0	40	0	0	1	1	1
1	4	19	15	Yao Koffikro	UTN	control.0	0	0	0	0	0	1	1	1
1	4	17	13	Yao Koffikro	UTN	control.0	0	0	0	0	0	1	1	1
1	4	27	23	Yao Koffikro	UTN	control.0	0	0	140	0	0	1	1	1
1	4	18	14	Yao Koffikro	UTN	control.0	0	0	0	0	0	1	1	1
1	4	20	16	Yao Koffikro	UTN	control.0	0	0	0	0	0	1	1	1
1	4	15	11	Yao Koffikro	ITN	treated.0	0	0	35	0	0	1	1	1
1	4	11	7	Yao Koffikro	ITN	treated.0	0	0	90	0	0	1	1	1
1	4	5	1	Yao Koffikro	ITN	treated.0	0	0	132	0	0	1	1	1
1	4	12	8	Yao Koffikro	ITN	treated.0	0	0	110	0	0	1	1	1
1	4	6	2	Yao Koffikro	ITN	treated.0	0	0	19	0	0	1	1	1
1	4	10	6	Yao Koffikro	ITN	treated.0	0	0	200	0	0	1	1	1
1	4	15	11	Yao Koffikro	ITN	treated.0	0	0	0	0	0	1	1	1
1	4	20	16	Yao Koffikro	ITN	treated.0	0	0	300	0	0	1	1	1
1	4	14	10	Yao Koffikro	ITN	treated.0	0	0	250	0	0	1	1	1
1	4	18	14	Yao Koffikro	ITN	treated.0	0	0	81	0	0	1	1	1
1	4	20	16	Yao Koffikro	ITN	treated.0	0	0	54	0	0	1	1	1
1	4	5	1	Yao Koffikro	ITN.PBO	treated.PBO.0	0	0	20	0	0	1	1	2
1	4	17	13	Yao Koffikro	ITN.PBO	treated.PBO.0	0	0	133	0	0	1	1	2
1	4	5	1	Yao Koffikro	ITN.PBO	treated.PBO.0	0	0	23	0	0	1	1	2
1	4	5	1	Yao Koffikro	ITN.PBO	treated.PBO.0	0	0	28	0	0	1	1	2
1	4	5	1	Yao Koffikro	ITN.PBO	treated.PBO.0	0	0	25	0	0	1	1	2
1	4	5	1	Yao Koffikro	ITN.PBO	treated.PBO.0	0	0	10	0	0	1	1	2
1	4	5	1	Yao Koffikro	ITN.PBO	treated.PBO.0	0	0	10	0	0	1	1	2
1	4	5	1	Yao Koffikro	ITN.PBO	treated.PBO.0	0	0	3	0	0	1	1	2
1	4	17	13	Yao Koffikro	ITN.PBO	treated.PBO.0	0	0	5	0	0	1	1	2
1	4	16	12	Yao Koffikro	ITN	treated.0	1	1	180	0	0	1	1	1
1	4	5	1	Yao Koffikro	ITN	treated.0	1	1	270	0	0	1	1	1
1	4	6	2	Yao Koffikro	ITN	treated.0	1	1	9	0	0	1	1	1
1	4	22	18	Yao Koffikro	ITN	treated.0	1	1	123	0	0	1	1	1
1	4	18	14	Yao Koffikro	ITN	treated.0	1	1	22	0	0	1	1	1
1	4	5	1	Yao Koffikro	ITN.PBO	treated.PBO.0	1	1	21	0	0	1	1	2
1	4	5	1	Yao Koffikro	ITN.PBO	treated.PBO.0	1	1	300	0	0	1	1	2
1	4	5	1	Yao Koffikro	ITN.PBO	treated.PBO.0	1	1	59	0	0	1	1	2
1	4	5	1	Yao Koffikro	ITN.PBO	treated.PBO.0	1	1	90	0	0	1	1	2
1	4	5	1	Yao Koffikro	ITN.PBO	treated.PBO.0	1	1	300	0	0	1	1	2
1	4	21	17	Yao Koffikro	ITN.PBO	treated.PBO.0	1	1	45	0	0	1	1	2
1	4	5	1	Yao Koffikro	ITN.PBO	treated.PBO.0	1	1	80	0	0	1	1	2
1	4	5	1	Yao Koffikro	ITN.PBO	treated.PBO.0	1	1	14	0	0	1	1	2
1	4	5	1	Yao Koffikro	ITN.PBO	treated.PBO.0	1	1	30	0	0	1	1	2
1	4	5	1	Yao Koffikro	ITN.PBO	treated.PBO.0	1	1	25	0	0	1	1	2
1	4	15	11	Yao Koffikro	UTN	control.1	0	0	262	150	1	1	1	1
1	4	24	20	Yao Koffikro	UTN	control.1	0	0	164	126	1	1	1	1
1	4	31	27	Yao Koffikro	UTN	control.1	0	0	203	180	1	1	1	1
1	4	24	20	Yao Koffikro	UTN	control.1	0	0	212	182	1	1	1	1
1	4	29	25	Yao Koffikro	UTN	control.1	0	0	208	185	1	1	1	1
1	4	24	20	Yao Koffikro	UTN	control.1	0	0	200	199	1	1	1	1
1	4	30	26	Yao Koffikro	UTN	control.1	0	0	300	300	1	1	1	1
1	4	5	1	Yao Koffikro	UTN	control.1	0	0	170	166	1	1	1	1
1	4	25	21	Yao Koffikro	UTN	control.1	0	0	225	80	1	1	1	1
1	4	29	25	Yao Koffikro	UTN	control.1	0	0	150	149	1	1	1	1
1	4	33	29	Yao Koffikro	UTN	control.1	0	0	300	300	1	1	1	1
1	4	24	20	Yao Koffikro	UTN	control.1	0	0	300	300	1	1	1	1
1	4	30	26	Yao Koffikro	ITN	treated.1	0	0	190	179	1	1	1	1
1	4	15	11	Yao Koffikro	ITN	treated.1	0	0	59	59	1	1	1	1
1	4	27	23	Yao Koffikro	ITN	treated.1	0	0	150	145	1	1	1	1
1	4	20	16	Yao Koffikro	ITN	treated.1	0	0	300	220	1	1	1	1
1	4	5	1	Yao Koffikro	ITN.PBO	treated.PBO.1	0	0	120	100	1	1	1	2
2	4	15	11	Yao Koffikro	UTN	control.0	0	0	181	0	0	1	1	1
2	4	16	12	Yao Koffikro	UTN	control.0	0	0	30	0	0	1	1	1
2	4	20	16	Yao Koffikro	UTN	control.0	0	0	0	0	0	1	1	1
2	4	8	4	Yao Koffikro	UTN	control.0	0	0	0	0	0	1	1	1
2	4	20	16	Yao Koffikro	UTN	control.0	0	0	31	0	0	1	1	1
2	4	16	12	Yao Koffikro	ITN	treated.0	0	0	58	0	0	1	1	1
2	4	12	8	Yao Koffikro	ITN	treated.0	0	0	36	0	0	1	1	1
2	4	17	13	Yao Koffikro	ITN	treated.0	0	0	54	0	0	1	1	1
2	4	13	9	Yao Koffikro	ITN	treated.0	0	0	22	0	0	1	1	1
2	4	16	12	Yao Koffikro	ITN	treated.0	0	0	140	0	0	1	1	1
2	4	5	1	Yao Koffikro	ITN	treated.0	0	0	90	0	0	1	1	1
2	4	9	5	Yao Koffikro	ITN	treated.0	0	0	230	0	0	1	1	1
2	4	20	16	Yao Koffikro	ITN	treated.0	0	0	27	0	0	1	1	1
2	4	12	8	Yao Koffikro	ITN	treated.0	0	0	36	0	0	1	1	1
2	4	5	1	Yao Koffikro	ITN.PBO	treated.PBO.0	0	0	20	0	0	1	1	2
2	4	5	1	Yao Koffikro	ITN.PBO	treated.PBO.0	0	0	3	0	0	1	1	2
2	4	5	1	Yao Koffikro	ITN.PBO	treated.PBO.0	0	0	243	0	0	1	1	2
2	4	12	8	Yao Koffikro	ITN.PBO	treated.PBO.0	0	0	5	0	0	1	1	2
2	4	5	1	Yao Koffikro	ITN.PBO	treated.PBO.0	0	0	11	0	0	1	1	2
2	4	5	1	Yao Koffikro	ITN.PBO	treated.PBO.0	0	0	23	0	0	1	1	2
2	4	5	1	Yao Koffikro	ITN.PBO	treated.PBO.0	0	0	35	0	0	1	1	2
2	4	10	6	Yao Koffikro	ITN.PBO	treated.PBO.0	0	0	0	0	0	1	1	2
2	4	5	1	Yao Koffikro	ITN.PBO	treated.PBO.0	0	1	300	0	0	1	1	2
2	4	5	1	Yao Koffikro	ITN.PBO	treated.PBO.0	0	1	125	0	0	1	1	2
2	4	16	12	Yao Koffikro	ITN	treated.0	1	1	30	0	0	1	1	1
2	4	17	13	Yao Koffikro	ITN	treated.0	1	1	25	0	0	1	1	1
2	4	21	17	Yao Koffikro	ITN	treated.0	1	1	130	0	0	1	1	1
2	4	5	1	Yao Koffikro	ITN.PBO	treated.PBO.0	1	1	20	0	0	1	1	2
2	4	5	1	Yao Koffikro	ITN.PBO	treated.PBO.0	1	1	80	0	0	1	1	2
2	4	5	1	Yao Koffikro	ITN.PBO	treated.PBO.0	1	1	40	0	0	1	1	2
2	4	5	1	Yao Koffikro	ITN.PBO	treated.PBO.0	1	1	70	0	0	1	1	2
2	4	5	1	Yao Koffikro	ITN.PBO	treated.PBO.0	1	1	106	0	0	1	1	2
2	4	5	1	Yao Koffikro	ITN.PBO	treated.PBO.0	1	1	123	0	0	1	1	2
2	4	5	1	Yao Koffikro	ITN.PBO	treated.PBO.0	1	1	185	0	0	1	1	2
2	4	31	27	Yao Koffikro	UTN	control.1	0	0	300	251	1	1	1	1
2	4	15	11	Yao Koffikro	UTN	control.1	0	0	254	128	1	1	1	1
2	4	25	21	Yao Koffikro	UTN	control.1	0	0	272	185	1	1	1	1
2	4	13	9	Yao Koffikro	UTN	control.1	0	0	80	54	1	1	1	1
2	4	21	17	Yao Koffikro	UTN	control.1	0	0	300	189	1	1	1	1
2	4	38	34	Yao Koffikro	UTN	control.1	0	0	300	300	1	1	1	1
2	4	15	11	Yao Koffikro	UTN	control.1	0	0	300	300	1	1	1	1
2	4	16	12	Yao Koffikro	UTN	control.1	0	0	300	143	1	1	1	1
2	4	26	22	Yao Koffikro	UTN	control.1	0	0	120	111	1	1	1	1
2	4	30	26	Yao Koffikro	UTN	control.1	0	0	231	181	1	1	1	1
2	4	22	18	Yao Koffikro	UTN	control.1	0	0	300	300	1	1	1	1
2	4	17	13	Yao Koffikro	UTN	control.1	0	0	300	140	1	1	1	1
2	4	17	13	Yao Koffikro	UTN	control.1	0	0	290	245	1	1	1	1
2	4	16	12	Yao Koffikro	ITN	treated.1	0	0	124	99	1	1	1	1
2	4	8	4	Yao Koffikro	ITN	treated.1	0	0	300	134	1	1	1	1
2	4	22	18	Yao Koffikro	ITN	treated.1	0	0	115	112	1	1	1	1
2	4	17	13	Yao Koffikro	ITN	treated.1	0	0	160	142	1	1	1	1
2	4	19	15	Yao Koffikro	ITN	treated.1	0	0	300	300	1	1	1	1
2	4	10	6	Yao Koffikro	ITN	treated.1	0	0	282	242	1	1	1	1
2	4	10	6	Yao Koffikro	ITN	treated.1	0	0	130	121	1	1	1	1
2	4	33	29	Yao Koffikro	ITN	treated.1	0	0	152	110	1	1	1	1
2	4	5	1	Yao Koffikro	ITN.PBO	treated.PBO.1	0	1	110	110	1	1	1	2
2	4	5	1	Yao Koffikro	ITN.PBO	treated.PBO.1	1	1	168	168	1	1	1	2
2	4	5	1	Yao Koffikro	ITN.PBO	treated.PBO.1	1	1	150	121	1	1	1	2
3	4	12	8	Yao Koffikro	UTN	control.0	0	0	32	0	0	1	1	1
3	4	6	2	Yao Koffikro	UTN	control.0	0	0	45	0	0	1	1	1
3	4	22	18	Yao Koffikro	UTN	control.0	0	0	0	0	0	1	1	1
3	4	17	13	Yao Koffikro	UTN	control.0	0	0	100	0	0	1	1	1
3	4	20	16	Yao Koffikro	UTN	control.0	0	0	0	0	0	1	1	1
3	4	13	9	Yao Koffikro	UTN	control.0	0	0	24	0	0	1	1	1
3	4	13	9	Yao Koffikro	UTN	control.0	0	0	9	0	0	1	1	1
3	4	17	13	Yao Koffikro	UTN	control.0	0	0	0	0	0	1	1	1
3	4	17	13	Yao Koffikro	UTN	control.0	0	0	57	0	0	1	1	1
3	4	20	16	Yao Koffikro	UTN	control.0	0	0	2	0	0	1	1	1
3	5	9	4	Yao Koffikro	UTN	control.0	0	0	0	0	0	1	1	1
3	5	16	11	Yao Koffikro	UTN	control.0	0	0	81	0	0	1	1	1
3	5	22	17	Yao Koffikro	UTN	control.0	0	0	27	0	0	1	1	1
3	5	24	19	Yao Koffikro	UTN	control.0	0	0	3	0	0	1	1	1
3	5	16	11	Yao Koffikro	UTN	control.0	0	0	0	0	0	1	1	1
3	5	20	15	Yao Koffikro	UTN	control.0	0	0	21	0	0	1	1	1
3	5	23	18	Yao Koffikro	UTN	control.0	0	0	45	0	0	1	1	1
3	5	16	11	Yao Koffikro	UTN	control.0	0	0	9	0	0	1	1	1
3	5	17	12	Yao Koffikro	UTN	control.0	0	0	1	0	0	1	1	1
3	5	25	20	Yao Koffikro	UTN	control.0	0	0	65	0	0	1	1	1
3	4	16	12	Yao Koffikro	ITN	treated.0	0	0	28	0	0	1	1	1
3	4	13	9	Yao Koffikro	ITN	treated.0	0	0	12	0	0	1	1	1
3	4	28	24	Yao Koffikro	ITN	treated.0	0	0	132	0	0	1	1	1
3	4	14	10	Yao Koffikro	ITN	treated.0	0	0	19	0	0	1	1	1
3	4	14	10	Yao Koffikro	ITN	treated.0	0	0	46	0	0	1	1	1
3	4	14	10	Yao Koffikro	ITN	treated.0	0	0	17	0	0	1	1	1
3	4	12	8	Yao Koffikro	ITN	treated.0	0	0	12	0	0	1	1	1
3	4	15	11	Yao Koffikro	ITN	treated.0	0	0	70	0	0	1	1	1
3	4	13	9	Yao Koffikro	ITN	treated.0	0	0	197	0	0	1	1	1
3	4	16	12	Yao Koffikro	ITN	treated.0	0	0	265	0	0	1	1	1
3	4	6	2	Yao Koffikro	ITN	treated.0	0	0	191	0	0	1	1	1
3	4	13	9	Yao Koffikro	ITN	treated.0	0	0	14	0	0	1	1	1
3	4	16	12	Yao Koffikro	ITN	treated.0	0	0	49	0	0	1	1	1
3	4	12	8	Yao Koffikro	ITN	treated.0	0	0	5	0	0	1	1	1
3	4	16	12	Yao Koffikro	ITN	treated.0	0	0	37	0	0	1	1	1
3	5	20	15	Yao Koffikro	ITN	treated.0	0	0	151	0	0	1	1	1
3	5	6	1	Yao Koffikro	ITN	treated.0	0	0	217	0	0	1	1	1
3	5	19	14	Yao Koffikro	ITN	treated.0	0	0	62	0	0	1	1	1
3	5	9	4	Yao Koffikro	ITN	treated.0	0	0	0	0	0	1	1	1
3	5	16	11	Yao Koffikro	ITN	treated.0	0	0	2	0	0	1	1	1
3	5	14	9	Yao Koffikro	ITN	treated.0	0	0	0	0	0	1	1	1
3	5	20	15	Yao Koffikro	ITN	treated.0	0	0	5	0	0	1	1	1
3	5	24	19	Yao Koffikro	ITN	treated.0	0	0	31	0	0	1	1	1
3	5	17	12	Yao Koffikro	ITN	treated.0	0	0	125	0	0	1	1	1
3	5	13	8	Yao Koffikro	ITN	treated.0	0	0	46	0	0	1	1	1
3	5	21	16	Yao Koffikro	ITN	treated.0	0	0	23	0	0	1	1	1
3	5	15	10	Yao Koffikro	ITN	treated.0	0	0	78	0	0	1	1	1
3	5	12	7	Yao Koffikro	ITN	treated.0	0	0	9	0	0	1	1	1
3	5	6	1	Yao Koffikro	ITN.PBO	treated.PBO.0	0	0	34	0	0	1	1	2
3	5	15	10	Yao Koffikro	ITN.PBO	treated.PBO.0	0	0	0	0	0	1	1	2
3	5	6	1	Yao Koffikro	ITN.PBO	treated.PBO.0	0	0	5	0	0	1	1	2
3	5	6	1	Yao Koffikro	ITN.PBO	treated.PBO.0	0	0	5	0	0	1	1	2
3	5	6	1	Yao Koffikro	ITN.PBO	treated.PBO.0	0	0	26	0	0	1	1	2
3	5	16	11	Yao Koffikro	ITN.PBO	treated.PBO.0	0	0	0	0	0	1	1	2
3	5	6	1	Yao Koffikro	ITN.PBO	treated.PBO.0	0	1	36	0	0	1	1	2
3	5	15	10	Yao Koffikro	ITN.PBO	treated.PBO.0	0	1	6	0	0	1	1	2
3	4	5	1	Yao Koffikro	ITN	treated.0	1	1	0	0	0	1	1	1
3	5	9	4	Yao Koffikro	ITN	treated.0	1	1	81	0	0	1	1	1
3	5	6	1	Yao Koffikro	ITN.PBO	treated.PBO.0	1	1	26	0	0	1	1	2
3	5	6	1	Yao Koffikro	ITN.PBO	treated.PBO.0	1	1	10	0	0	1	1	2
3	5	14	9	Yao Koffikro	ITN.PBO	treated.PBO.0	1	1	26	0	0	1	1	2
3	5	6	1	Yao Koffikro	ITN.PBO	treated.PBO.0	1	1	10	0	0	1	1	2
3	5	6	1	Yao Koffikro	ITN.PBO	treated.PBO.0	1	1	28	0	0	1	1	2
3	5	6	1	Yao Koffikro	ITN.PBO	treated.PBO.0	1	1	15	0	0	1	1	2
3	5	6	1	Yao Koffikro	ITN.PBO	treated.PBO.0	1	1	5	0	0	1	1	2
3	5	6	1	Yao Koffikro	ITN.PBO	treated.PBO.0	1	1	46	0	0	1	1	2
3	5	6	1	Yao Koffikro	ITN.PBO	treated.PBO.0	1	1	6	0	0	1	1	2
3	5	6	1	Yao Koffikro	ITN.PBO	treated.PBO.0	1	1	57	0	0	1	1	2
3	5	6	1	Yao Koffikro	ITN.PBO	treated.PBO.0	1	1	22	0	0	1	1	2
3	5	6	1	Yao Koffikro	ITN.PBO	treated.PBO.0	1	1	2	0	0	1	1	2
3	5	6	1	Yao Koffikro	ITN.PBO	treated.PBO.0	1	1	7	0	0	1	1	2
3	5	6	1	Yao Koffikro	ITN.PBO	treated.PBO.0	1	1	112	0	0	1	1	2
3	5	6	1	Yao Koffikro	ITN.PBO	treated.PBO.0	1	1	16	0	0	1	1	2
3	4	25	21	Yao Koffikro	UTN	control.1	0	0	300	298	1	1	1	1
3	4	23	19	Yao Koffikro	UTN	control.1	0	0	262	257	1	1	1	1
3	4	26	22	Yao Koffikro	UTN	control.1	0	0	290	180	1	1	1	1
3	4	20	16	Yao Koffikro	UTN	control.1	0	0	189	185	1	1	1	1
3	5	20	15	Yao Koffikro	UTN	control.1	0	0	246	229	1	1	1	1
3	4	27	23	Yao Koffikro	UTN	control.1	0	0	260	256	1	1	1	1
3	4	22	18	Yao Koffikro	UTN	control.1	0	0	297	260	1	1	1	1
3	4	21	17	Yao Koffikro	UTN	control.1	0	0	300	294	1	1	1	1
3	4	28	24	Yao Koffikro	UTN	control.1	0	0	294	254	1	1	1	1
3	4	35	31	Yao Koffikro	UTN	control.1	0	0	300	300	1	1	1	1
3	4	29	25	Yao Koffikro	UTN	control.1	0	0	289	276	1	1	1	1
3	4	22	18	Yao Koffikro	UTN	control.1	0	0	272	267	1	1	1	1
3	4	39	35	Yao Koffikro	UTN	control.1	0	0	291	286	1	1	1	1
3	4	21	17	Yao Koffikro	UTN	control.1	0	0	300	218	1	1	1	1
3	4	10	6	Yao Koffikro	UTN	control.1	0	0	293	291	1	1	1	1
3	4	21	17	Yao Koffikro	UTN	control.1	0	0	240	239	1	1	1	1
3	4	24	20	Yao Koffikro	UTN	control.1	0	0	186	184	1	1	1	1
3	4	14	10	Yao Koffikro	UTN	control.1	0	0	228	224	1	1	1	1
3	4	20	16	Yao Koffikro	UTN	control.1	0	0	215	213	1	1	1	1
3	4	26	22	Yao Koffikro	UTN	control.1	0	0	300	290	1	1	1	1
3	4	29	25	Yao Koffikro	UTN	control.1	0	0	227	206	1	1	1	1
3	5	18	13	Yao Koffikro	UTN	control.1	0	0	296	216	1	1	1	1
3	5	23	18	Yao Koffikro	UTN	control.1	0	0	259	238	1	1	1	1
3	5	17	12	Yao Koffikro	UTN	control.1	0	0	300	254	1	1	1	1
3	5	35	30	Yao Koffikro	UTN	control.1	0	0	286	280	1	1	1	1
3	5	18	13	Yao Koffikro	UTN	control.1	0	0	217	206	1	1	1	1
3	5	11	6	Yao Koffikro	UTN	control.1	0	0	201	160	1	1	1	1
3	5	24	19	Yao Koffikro	ITN	treated.1	0	0	186	156	1	1	1	1
3	5	17	12	Yao Koffikro	ITN	treated.1	0	0	191	186	1	1	1	1
3	5	11	6	Yao Koffikro	ITN	treated.1	0	0	111	106	1	1	1	1
3	5	19	14	Yao Koffikro	ITN	treated.1	0	0	132	129	1	1	1	1
3	5	6	1	Yao Koffikro	ITN	treated.1	0	0	267	121	1	1	1	1
3	5	18	13	Yao Koffikro	ITN	treated.1	0	0	264	139	1	1	1	1
3	5	27	22	Yao Koffikro	ITN	treated.1	0	0	201	121	1	1	1	1
3	5	20	15	Yao Koffikro	ITN	treated.1	0	0	226	190	1	1	1	1
3	5	23	18	Yao Koffikro	ITN	treated.1	0	0	83	61	1	1	1	1
3	5	19	14	Yao Koffikro	ITN	treated.1	0	0	212	96	1	1	1	1
3	4	25	21	Yao Koffikro	ITN	treated.1	0	0	123	118	1	1	1	1
3	4	17	13	Yao Koffikro	ITN	treated.1	0	0	69	64	1	1	1	1
3	4	30	26	Yao Koffikro	ITN	treated.1	0	0	95	84	1	1	1	1
3	4	18	14	Yao Koffikro	ITN	treated.1	0	0	230	220	1	1	1	1
3	4	12	8	Yao Koffikro	ITN	treated.1	0	0	115	36	1	1	1	1
3	4	13	9	Yao Koffikro	ITN	treated.1	0	0	69	65	1	1	1	1
3	4	17	13	Yao Koffikro	ITN	treated.1	0	0	192	186	1	1	1	1
3	4	6	2	Yao Koffikro	ITN	treated.1	0	0	163	156	1	1	1	1
3	4	24	20	Yao Koffikro	ITN	treated.1	0	0	236	45	1	1	1	1
3	4	9	5	Yao Koffikro	ITN	treated.1	0	0	216	181	1	1	1	1
3	4	23	19	Yao Koffikro	ITN	treated.1	0	0	248	116	1	1	1	1
3	4	19	15	Yao Koffikro	ITN	treated.1	0	0	259	189	1	1	1	1
3	4	21	17	Yao Koffikro	ITN	treated.1	0	0	274	92	1	1	1	1
3	4	18	14	Yao Koffikro	ITN	treated.1	0	0	220	79	1	1	1	1
3	4	14	10	Yao Koffikro	ITN	treated.1	0	0	216	212	1	1	1	1
3	5	6	1	Yao Koffikro	ITN.PBO	treated.PBO.1	1	1	114	74	1	1	1	2
3	5	6	1	Yao Koffikro	ITN.PBO	treated.PBO.1	1	1	72	57	1	1	1	2
4	4	17	13	Yao Koffikro	UTN	control.0	0	0	0	0	0	1	2	1
4	4	10	6	Yao Koffikro	UTN	control.0	0	0	0	0	0	1	2	1
4	4	13	9	Yao Koffikro	UTN	control.0	0	0	23	0	0	1	2	1
4	4	16	12	Yao Koffikro	UTN	control.0	0	0	80	0	0	1	2	1
4	4	17	13	Yao Koffikro	UTN	control.0	0	0	38	0	0	1	2	1
4	4	38	34	Yao Koffikro	UTN	control.0	0	0	200	0	0	1	2	1
4	4	27	23	Yao Koffikro	UTN	control.0	0	0	0	0	0	1	2	1
4	5	16	11	Yao Koffikro	UTN	control.0	0	0	15	0	0	1	2	1
4	5	16	11	Yao Koffikro	UTN	control.0	0	0	21	0	0	1	2	1
4	5	24	19	Yao Koffikro	UTN	control.0	0	0	32	0	0	1	2	1
4	5	36	31	Yao Koffikro	UTN	control.0	0	0	109	0	0	1	2	1
4	5	10	5	Yao Koffikro	UTN	control.0	0	0	0	0	0	1	2	1
4	5	32	27	Yao Koffikro	UTN	control.0	0	0	0	0	0	1	2	1
4	5	19	14	Yao Koffikro	UTN	control.0	0	0	18	0	0	1	2	1
4	5	17	12	Yao Koffikro	UTN	control.0	0	0	0	0	0	1	2	1
4	5	26	21	Yao Koffikro	UTN	control.0	0	0	66	0	0	1	2	1
4	5	25	20	Yao Koffikro	UTN	control.0	0	0	0	0	0	1	2	1
4	5	15	10	Yao Koffikro	UTN	control.0	0	0	4	0	0	1	2	1
4	5	27	22	Yao Koffikro	UTN	control.0	0	0	15	0	0	1	2	1
4	5	13	8	Yao Koffikro	UTN	control.0	0	0	0	0	0	1	2	1
4	5	13	8	Yao Koffikro	UTN	control.0	0	0	0	0	0	1	2	1
4	5	17	12	Yao Koffikro	UTN	control.0	0	0	17	0	0	1	2	1
4	4	17	13	Yao Koffikro	UTN	control.1	0	0	252	250	1	1	2	1
4	4	19	15	Yao Koffikro	UTN	control.1	0	0	232	232	1	1	2	1
4	4	29	25	Yao Koffikro	UTN	control.1	0	0	300	300	1	1	2	1
4	4	18	14	Yao Koffikro	UTN	control.1	0	0	252	252	1	1	2	1
4	4	22	18	Yao Koffikro	UTN	control.1	0	0	155	150	1	1	2	1
4	4	22	18	Yao Koffikro	UTN	control.1	0	0	300	268	1	1	2	1
4	4	16	12	Yao Koffikro	UTN	control.1	0	0	300	300	1	1	2	1
4	4	41	37	Yao Koffikro	UTN	control.1	0	0	300	300	1	1	2	1
4	4	17	13	Yao Koffikro	UTN	control.1	0	0	184	163	1	1	2	1
4	4	24	20	Yao Koffikro	UTN	control.1	0	0	300	300	1	1	2	1
4	4	21	17	Yao Koffikro	UTN	control.1	0	0	300	286	1	1	2	1
4	4	20	16	Yao Koffikro	UTN	control.1	0	0	300	198	1	1	2	1
4	4	34	30	Yao Koffikro	UTN	control.1	0	0	300	300	1	1	2	1
4	4	28	24	Yao Koffikro	UTN	control.1	0	0	240	201	1	1	2	1
4	4	20	16	Yao Koffikro	UTN	control.1	0	0	300	280	1	1	2	1
4	4	19	15	Yao Koffikro	UTN	control.1	0	0	300	230	1	1	2	1
4	4	18	14	Yao Koffikro	UTN	control.1	0	0	283	276	1	1	2	1
4	4	28	24	Yao Koffikro	UTN	control.1	0	0	300	251	1	1	2	1
4	4	15	11	Yao Koffikro	UTN	control.1	0	0	237	213	1	1	2	1
4	4	39	35	Yao Koffikro	UTN	control.1	0	0	201	196	1	1	2	1
4	4	7	3	Yao Koffikro	UTN	control.1	0	0	269	275	1	1	2	1
4	4	13	9	Yao Koffikro	UTN	control.1	0	0	190	144	1	1	2	1
4	4	13	9	Yao Koffikro	UTN	control.1	0	0	125	121	1	1	2	1
4	5	17	12	Yao Koffikro	UTN	control.1	0	0	300	273	1	1	2	1
4	5	18	13	Yao Koffikro	UTN	control.1	0	0	136	131	1	1	2	1
4	5	19	14	Yao Koffikro	UTN	control.1	0	0	300	300	1	1	2	1
4	5	15	10	Yao Koffikro	UTN	control.1	0	0	267	257	1	1	2	1
4	5	26	21	Yao Koffikro	UTN	control.1	0	0	245	237	1	1	2	1
4	5	30	25	Yao Koffikro	UTN	control.1	0	0	300	270	1	1	2	1
4	5	41	36	Yao Koffikro	UTN	control.1	0	0	300	300	1	1	2	1
4	5	18	13	Yao Koffikro	UTN	control.1	0	0	300	300	1	1	2	1
4	5	22	17	Yao Koffikro	UTN	control.1	0	0	300	296	1	1	2	1
4	5	24	19	Yao Koffikro	UTN	control.1	0	0	300	300	1	1	2	1
4	5	20	15	Yao Koffikro	UTN	control.1	0	0	300	300	1	1	2	1
4	5	23	18	Yao Koffikro	UTN	control.1	0	0	300	300	1	1	2	1
4	5	11	6	Yao Koffikro	UTN	control.1	0	0	300	289	1	1	2	1
4	5	9	4	Yao Koffikro	UTN	control.1	0	0	300	300	1	1	2	1
4	5	23	18	Yao Koffikro	UTN	control.1	0	0	245	243	1	1	2	1
4	5	23	18	Yao Koffikro	UTN	control.1	0	0	300	290	1	1	2	1
4	4	16	12	Yao Koffikro	ITN	treated.0	0	0	220	0	0	1	2	1
4	4	10	6	Yao Koffikro	ITN	treated.0	0	0	35	0	0	1	2	1
4	4	20	16	Yao Koffikro	ITN	treated.0	0	0	0	0	0	1	2	1
4	4	14	10	Yao Koffikro	ITN	treated.0	0	0	30	0	0	1	2	1
4	4	11	7	Yao Koffikro	ITN	treated.0	0	0	23	0	0	1	2	1
4	4	5	1	Yao Koffikro	ITN	treated.0	0	1	42	0	0	1	2	1
4	4	14	10	Yao Koffikro	ITN	treated.0	0	0	43	0	0	1	2	1
4	4	19	15	Yao Koffikro	ITN	treated.0	0	0	15	0	0	1	2	1
4	4	26	22	Yao Koffikro	ITN	treated.0	0	0	29	0	0	1	2	1
4	4	13	9	Yao Koffikro	ITN	treated.0	0	0	17	0	0	1	2	1
4	4	14	10	Yao Koffikro	ITN	treated.0	0	0	65	0	0	1	2	1
4	4	19	15	Yao Koffikro	ITN	treated.0	0	0	26	0	0	1	2	1
4	4	8	4	Yao Koffikro	ITN	treated.0	0	0	70	0	0	1	2	1
4	4	19	15	Yao Koffikro	ITN	treated.0	0	0	5	0	0	1	2	1
4	4	14	10	Yao Koffikro	ITN	treated.0	0	0	2	0	0	1	2	1
4	4	5	1	Yao Koffikro	ITN	treated.0	0	0	300	0	0	1	2	1
4	4	9	5	Yao Koffikro	ITN	treated.0	0	0	29	0	0	1	2	1
4	4	15	11	Yao Koffikro	ITN	treated.0	0	0	191	0	0	1	2	1
4	5	14	9	Yao Koffikro	ITN	treated.0	0	0	64	0	0	1	2	1
4	5	9	4	Yao Koffikro	ITN	treated.0	0	0	193	0	0	1	2	1
4	5	15	10	Yao Koffikro	ITN	treated.0	0	0	125	0	0	1	2	1
4	5	19	14	Yao Koffikro	ITN	treated.0	0	0	54	0	0	1	2	1
4	5	21	16	Yao Koffikro	ITN	treated.0	0	0	15	0	0	1	2	1
4	5	10	5	Yao Koffikro	ITN	treated.0	0	0	181	0	0	1	2	1
4	5	14	9	Yao Koffikro	ITN	treated.0	0	0	9	0	0	1	2	1
4	5	14	9	Yao Koffikro	ITN	treated.0	0	0	57	0	0	1	2	1
4	5	17	12	Yao Koffikro	ITN	treated.0	0	0	70	0	0	1	2	1
4	5	23	18	Yao Koffikro	ITN	treated.0	0	0	0	0	0	1	2	1
4	5	22	17	Yao Koffikro	ITN	treated.0	0	0	5	0	0	1	2	1
4	5	9	4	Yao Koffikro	ITN	treated.0	0	0	246	0	0	1	2	1
4	5	17	12	Yao Koffikro	ITN	treated.0	0	0	28	0	0	1	2	1
4	5	9	4	Yao Koffikro	ITN	treated.0	0	0	21	0	0	1	2	1
4	5	17	12	Yao Koffikro	ITN	treated.0	0	0	26	0	0	1	2	1
4	5	17	12	Yao Koffikro	ITN	treated.0	0	0	238	0	0	1	2	1
4	5	13	8	Yao Koffikro	ITN	treated.0	0	0	16	0	0	1	2	1
4	5	11	6	Yao Koffikro	ITN	treated.0	0	0	0	0	0	1	2	1
4	5	21	16	Yao Koffikro	ITN	treated.0	0	0	0	0	0	1	2	1
4	5	14	9	Yao Koffikro	ITN	treated.0	0	0	0	0	0	1	2	1
4	5	15	10	Yao Koffikro	ITN	treated.0	0	0	0	0	0	1	2	1
4	4	8	4	Yao Koffikro	ITN	treated.1	0	0	143	133	1	1	2	1
4	4	21	17	Yao Koffikro	ITN	treated.1	0	0	280	280	1	1	2	1
4	4	14	10	Yao Koffikro	ITN	treated.1	0	0	278	128	1	1	2	1
4	4	24	20	Yao Koffikro	ITN	treated.1	0	0	300	227	1	1	2	1
4	4	24	20	Yao Koffikro	ITN	treated.1	0	0	170	128	1	1	2	1
4	4	15	11	Yao Koffikro	ITN	treated.1	0	0	136	91	1	1	2	1
4	4	29	25	Yao Koffikro	ITN	treated.1	0	0	300	244	1	1	2	1
4	4	14	10	Yao Koffikro	ITN	treated.1	0	0	150	133	1	1	2	1
4	4	27	23	Yao Koffikro	ITN	treated.1	0	0	218	125	1	1	2	1
4	4	41	37	Yao Koffikro	ITN	treated.1	0	0	300	127	1	1	2	1
4	4	23	19	Yao Koffikro	ITN	treated.1	0	0	220	216	1	1	2	1
4	4	21	17	Yao Koffikro	ITN	treated.1	0	0	290	160	1	1	2	1
4	4	20	16	Yao Koffikro	ITN	treated.1	0	0	179	95	1	1	2	1
4	5	24	19	Yao Koffikro	ITN	treated.1	0	0	196	193	1	1	2	1
4	5	23	18	Yao Koffikro	ITN	treated.1	0	0	300	260	1	1	2	1
4	5	17	12	Yao Koffikro	ITN	treated.1	0	0	134	124	1	1	2	1
4	5	23	18	Yao Koffikro	ITN	treated.1	0	0	156	139	1	1	2	1
4	5	25	20	Yao Koffikro	ITN	treated.1	0	0	149	141	1	1	2	1
4	5	20	15	Yao Koffikro	ITN	treated.1	0	0	142	136	1	1	2	1
4	5	14	9	Yao Koffikro	ITN	treated.1	0	0	300	300	1	1	2	1
4	5	15	10	Yao Koffikro	ITN	treated.1	0	0	140	116	1	1	2	1
4	5	24	19	Yao Koffikro	ITN	treated.1	0	0	144	128	1	1	2	1
4	5	18	13	Yao Koffikro	ITN	treated.1	0	0	121	107	1	1	2	1
